# Supplementary material for: Transposable Element Expression Profiles in Premalignant Pigment Cell Lesions and Melanoma of Xiphophorus
Source: MDPI journal article supplement (doi:10.3390/genes15050620), 2024-05-14
Supplement: s1 [file s1]

## Supplement

|                                          |                          |
|------------------------------------------|--------------------------|
| Efa1_for                                 | AGTGAAATCCGTGGAGATGC     |
| Efa1_rev                                 | ATCTGACCTGGGTGGTTCAG     |
| Xma_rnd-5_family-531_DNA/hAT-Charlie_for | TCAAGTACCCCCTGACACGGGC   |
| Xma_rnd-5_family-531_DNA/hAT-Charlie_rev | CTTCCTGGTGGTCACCGTCTTCTG |
| Gaf_rnd-5_family-1020_Unknown_for        | ACATGCTGAGAGTGAAAATCCT   |
| Gaf_rnd-5_family-1020_Unknown_rev        | CAAACAGGAAGGGCGGGAC      |
| Oni_rnd-6_family-283_DNA/hAT_for         | ACTGGGAGGTTGAGTGGAGA     |
| Oni_rnd-6_family-283_DNA/hAT_rev         | TGTGCCAGACAGAGTAACCA     |
| Cse_Piler_54.65_DNA/hAT-Charlie_for      | TCAGTTTGAGTTGGCCGAGT     |
| Cse_Piler_54.65_DNA/hAT-Charlie_rev      | GGGAAAGGTTTTGCTCGCAG     |

Table S1: Sequences of qRT-PCR primers

### Expression profiling of selected TEs in melanocytic lesions

Expression levels were in good correlation to sequencing results and qPCR with Oni\_rnd-6\_family-283\_DNA/hAT being highly expressed and Cse\_Piler\_54.65\_DNA/hAT-Charlie having low expression levels (Supplementary figure 1, A-D). Compared to benign tissue, Xma\_rnd-5\_family-531\_DNA/hAT-Charlie showed a significant increase in expression in malignant melanoma of the 407 strain (p-value: < 0.001), while decreased expression was observed in melanoma tissue of the 1844 strain. Gaf\_rnd-5\_family-1020\_Unknown showed increased expression levels in all types of melanocytic tissues with a strong overexpression in the 407 melanoma. In case of Oni\_rnd-6\_family-283\_DNA/hAT and Cse\_Piler\_54.65\_DNA/hAT-Charlie a decreased expression was detected in malignant melanomas of both strains compared to benign lesions. To gain a better understanding of the expression patterns, qPCR was extended to additional non-tumorous *Xiphophorus* tissue types including brain, eye, gills, and liver. The lowest expression of Xma\_rnd-5\_family-531\_DNA/hAT-Charlie was determined in liver tissue. Slightly increased values were found in gills and eye, whereas the highest

expression was measured in brain. Comparison of expression in malignant melanoma, benign lesions and healthy skin showed an increase in expression in the 407 malignant tissue (figure 8A). A similar expression pattern between tissue types was seen for Gaf\_rnd-5\_family-1020\_Unknown (Figure 8B). With the exception of the 407 tumor strain the lowest expression was recorded in liver tissue. Slightly increased expression could be detected in gills, while the highest expression was measured in brain tissue. The lowest expression of Oni\_rnd-6\_family-283\_DNA/hAT was recorded in liver tissue. In contrast, a slightly increased expression was determined in brain and eye of all investigated fish lines. The highest expression levels were seen in gill tissue. Cse\_Piler\_54.65\_DNA/hAT-Charlie showed an overall low expression. With the exception of brain tissue,  $\Delta$ CT values > 7 were observed within the different entities.

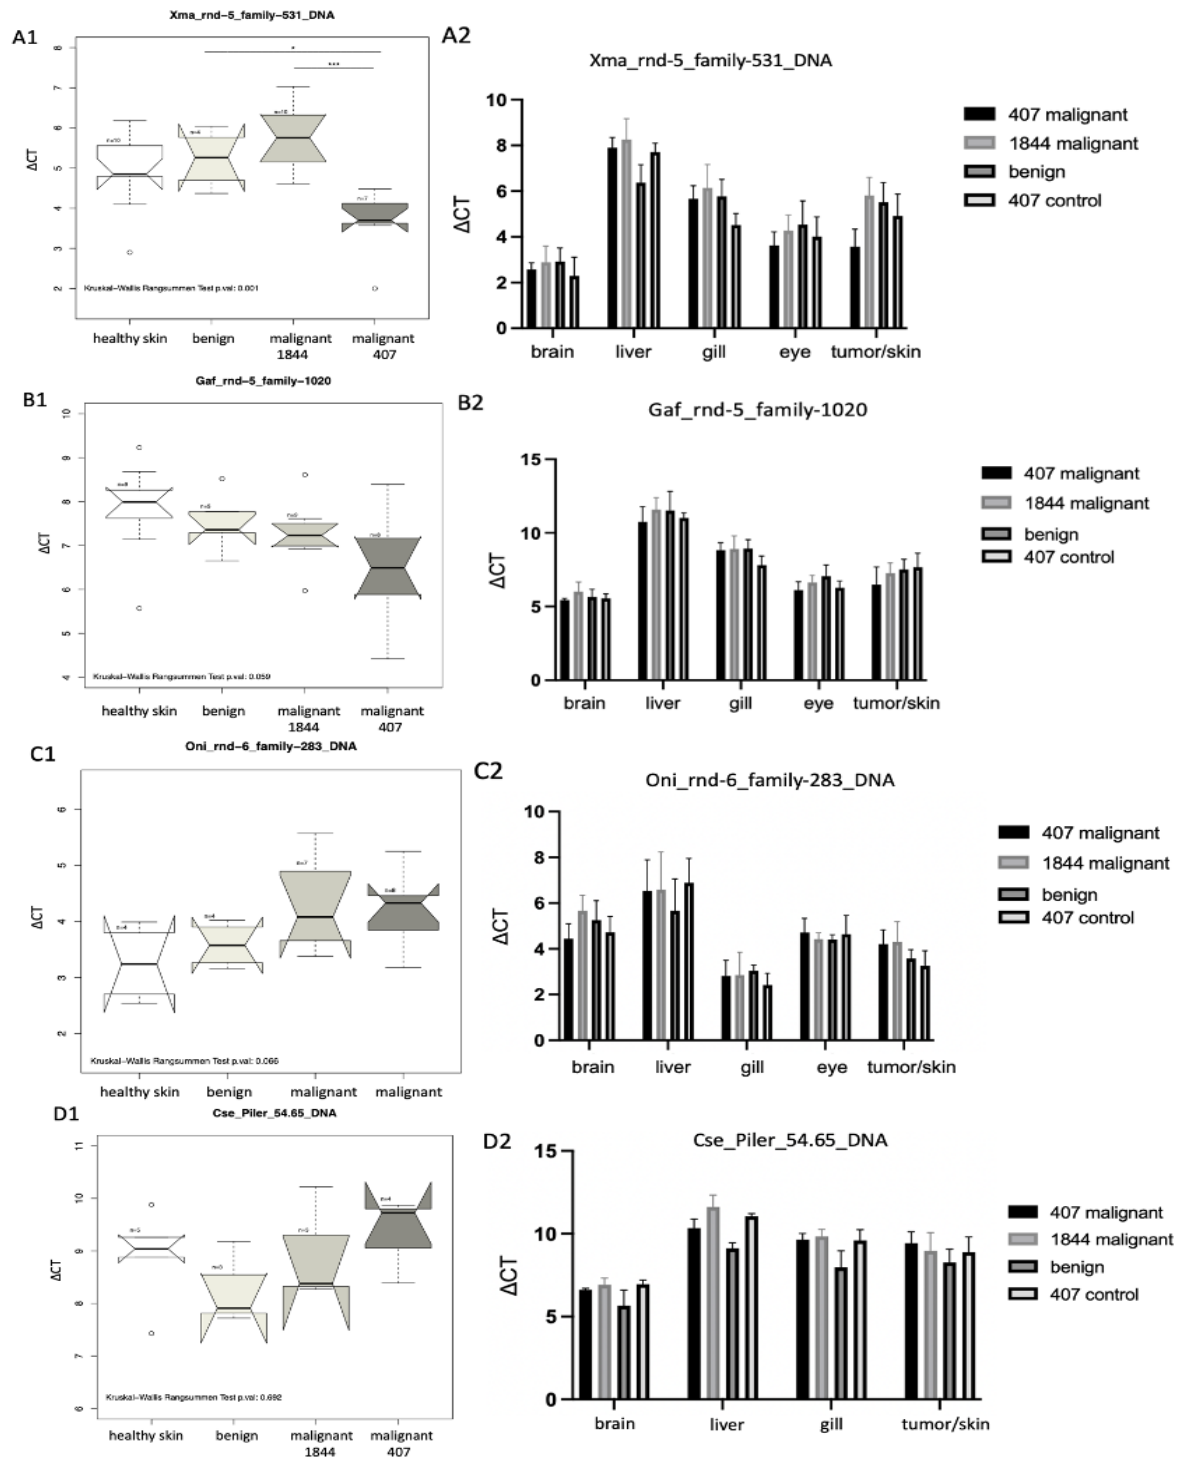

**Figure S1:** Relative expression ( $\Delta CT$ ) of 4 TEs in different *Xiphophorus* tissues. (A1, A2) Relative expression of Xma\_rnd-5\_family-531\_DNA/hAT-Charlie (healthy skin: n=10, benign lesions: n=4, 1844 malignant: n=10, 407 malignant: n=7). (B1, B2) Relative expression of Gaf\_rnd-5\_family-1020\_Unknown (healthy skin: n=9, benign lesions: n=5, 1844 malignant: n=9, 407 malignant: n=8). (C1, C2) Relative expression of Oni\_rnd-6\_family-283\_DNA/hAT (healthy skin: n=4, benign lesions: n=4, 1844 malignant: n=7, 407 malignant: n=8). (D1, D2)

Relative expression of Cse\_Piler\_54.65\_DNA/hAT-Charlie (healthy skin: n=5, benign lesions: n=3, 1844 malignant: n=3, 407 malignant: n=4).
